# Supplementary material for: Suicide Risk Factors among Polish Adults Aged 65 or Older in 2000–2018 Compared with Selected Countries Worldwide
Source: MDPI journal article supplement (doi:10.3390/ijerph18189921), 2021-09-21
Supplement: s1 [file s1]

**Table S1.** Deaths caused by suicide in adults aged 65 or older per 100,000 people in European countries, and the change in the rates over the period 2017–2000.

| Country/Year          | Males |      |      | Females |      |      | Males     | Females 2017– |
|-----------------------|-------|------|------|---------|------|------|-----------|---------------|
|                       | 2000  | 2010 | 2017 | 2000    | 2010 | 2017 | 2017–2000 | 2000          |
| <b>United Kingdom</b> | 11.7  | 9.8  | 10.1 | 3.8     | 3.0  | 3.2  | –14.2%    | –16.0%        |
| <b>Ireland</b>        | 11.5  | 9.5  | 11.9 | 4.1     | 3.2  | 2.6  | 3.9%      | –37.0%        |
| <b>Greece</b>         | 8.8   | 9.3  | 12.3 | 2.1     | 1.2  | 2.6  | 40.9%     | 24.0%         |
| <b>Italy</b>          | 24.1  | 20.4 | 18.5 | 6.5     | 4.3  | 4.0  | –23.4%    | –37.7%        |
| <b>Netherlands</b>    | 20.0  | 16.8 | 18.5 | 8.5     | 6.4  | 8.9  | –7.4%     | 5.3%          |
| <b>Norway</b>         | 22.5  | 23.5 | 19.9 | 6.3     | 5.6  | 4.9  | –11.6%    | –22.4%        |
| <b>Slovakia</b>       | 40.0  | 28.7 | 20.1 | 8.4     | 4.3  | 2.8  | –49.6%    | –66.5%        |
| <b>Spain</b>          | 31.8  | 23.3 | 23.3 | 8.5     | 4.9  | 6.1  | –26.8%    | –27.7%        |
| <b>Poland</b>         | 31.6  | 36.1 | 26.2 | 6.7     | 6.1  | 4.1  | –17.0%    | –39.6%        |
| <b>Romania</b>        | 30.6  | 29.8 | 26.8 | 8.7     | 7.8  | 5.4  | –12.2%    | –38.5%        |
| <b>Finland</b>        | 37.2  | 31.2 | 27.0 | 10.3    | 8.2  | 7.7  | –27.6%    | –25.4%        |
| <b>Sweden</b>         | 36.1  | 27.7 | 28.3 | 10.2    | 8.5  | 8.2  | –21.6%    | –19.7%        |
| <b>Czech Republic</b> | 52.3  | 37.8 | 32.8 | 14.0    | 7.2  | 8.1  | –37.3%    | –42.0%        |
| <b>Germany</b>        | 42.4  | 34.1 | 35.0 | 14.1    | 11.0 | 9.0  | –17.4%    | –36.3%        |
| <b>Portugal</b>       | 27.9  | 45.2 | 35.0 | 5.3     | 9.7  | 8.0  | 25.4%     | 51.2%         |
| <b>Switzerland</b>    | 60.3  | 36.5 | 38.2 | 21.0    | 9.7  | 8.4  | –36.6%    | –60.2%        |
| <b>Bulgaria</b>       | 56.8  | 40.3 | 38.4 | 24.1    | 12.7 | 9.7  | –32.4%    | –59.9%        |
| <b>Latvia</b>         | 90.6  | 50.6 | 43.2 | 24.5    | 10.0 | 13.8 | –52.3%    | –43.6%        |
| <b>Estonia</b>        | 54.5  | 46.7 | 46.2 | 25.0    | 12.2 | 11.9 | –15.1%    | –52.3%        |
| <b>Austria</b>        | 68.7  | 50.1 | 56.4 | 20.6    | 12.6 | 10.8 | –17.9%    | –47.7%        |
| <b>Hungary</b>        | 97.9  | 80.5 | 59.4 | 37.2    | 19.5 | 13.7 | –39.4%    | –63.2%        |
| <b>Lithuania</b>      | 92.3  | 68.7 | 68.1 | 25.9    | 16.1 | 16.4 | –26.3%    | –36.5%        |
| <b>Slovenia</b>       | 106.4 | 69.8 | 71.1 | 28.6    | 12.2 | 15.0 | –33.2%    | –47.7%        |

Source: Eurostat database.
